## RESEARCH ARTICLE

# Reduced thermal tolerance during salinity acclimation in brook trout (*Salvelinus fontinalis*) can be rescued by prior treatment with cortisol

Ciaran A. Shaughnessy<sup>1,2,\*</sup> and Stephen D. McCormick<sup>1,2</sup>

## ABSTRACT

The aims of this study were to assess whether thermal tolerance of brook trout (*Salvelinus fontinalis*) is affected during seawater (SW) acclimation and to investigate the role of cortisol in osmoregulation and thermal tolerance during SW acclimation. Freshwater (FW)-acclimated brook trout at 18°C ( $T_{acc}$ ) were exposed to SW for 16 days, whilst maintaining a FW control. Fish were examined for critical thermal maximum ( $CT_{max}$ ) 0 (before), 2, 5 and 16 days after SW exposure, and sampled at  $T_{acc}$  and  $CT_{max}$  for analysis of plasma cortisol, glucose and  $Cl^-$ , gill  $Na^+/K^+$ -ATPase (NKA) activity and heat shock protein 70 (HSP70) abundance, and white muscle water content. At 2 days in SW,  $CT_{max}$  was significantly reduced (from 31 to 26°C), and then recovered by 16 days. This transient decrease in thermal tolerance coincided with a transient increase in plasma  $Cl^-$  and decrease in muscle moisture content. Salinity itself had no effect on gill HSP70 abundance compared with the large and immediate effects of high temperature exposure during  $CT_{max}$  testing. To examine the role of cortisol in osmoregulation, brook trout were administered a cortisol implant (5 and 25  $\mu g g^{-1}$  CORT) prior to SW exposure. Both CORT doses significantly increased their capacity to maintain plasma  $Cl^-$  during SW acclimation. Treatment with the 25  $\mu g g^{-1}$  CORT dose was shown to significantly improve  $CT_{max}$  after 2 days in SW, and  $CT_{max}$  was associated with plasma  $Cl^-$  and muscle moisture content. These findings indicate that brook trout are sensitive to temperature during SW acclimation and that thermal tolerance is associated with ion and water balance during SW acclimation.

**KEY WORDS:** Osmoregulation, Temperature, Critical thermal maximum

## INTRODUCTION

Migratory and estuarine fishes encounter a wide range of environmental conditions throughout their life, including changes in temperature, salinity and dissolved gases, and it is important to understand how changes in environmental conditions impact the physiology of these fishes. Although the physiological processes of thermal tolerance and salinity acclimation in fishes are relatively well understood, whether and how thermal tolerance is affected by salinity acclimation remains unclear.

In fishes and other ectotherms, temperature is known to have rapid effects on metabolism and behavior (Clarke and Johnston, 1999; Gillooly et al., 2001), and long-term effects on growth, fecundity and survival (Berrigan and Charnov, 1994; Jonsson and Jonsson, 2009). A widely used metric by ecologists and physiologists for quantifying acute thermal tolerance in a repeatable manner is critical thermal maximum ( $CT_{max}$ ) (Becker and Genoway, 1979; Beitinger et al., 2000; Gunderson and Stillman, 2015; Lutterschmidt and Hutchison, 1997), which is determined experimentally by increasing the temperature of water in a test chamber at a constant rate – the temperature at which the subject loses equilibrium ( $T_{LOE}$ ) is considered its  $CT_{max}$ . A widely used metric for evaluating the cellular response to thermal stress is the protein abundance of heat shock proteins (HSPs), a large family of highly conserved cellular proteins that are involved in various cellular processes including protein assembly, folding, translocation and disassembly, and the regulation and expression of which have been studied extensively in fishes (Deane and Woo, 2011). HSPs have a well-documented role in fishes in response to tolerating thermal stress (Basu et al., 2002; Iwama et al., 1999).

Studies assessing thermal tolerance in fishes and other aquatic ectotherms have been conducted using freshwater (FW)-acclimated (Barrionuevo and Femandes, 1995; Currie et al., 1998; Elliott and Elliott, 1995; Zaragoza et al., 2008; Zhang and Kieffer, 2014) or SW-acclimated animals (Fangue et al., 2006; Healy and Schulte, 2012a,b; Madeira et al., 2013; Murchie et al., 2011; Tsuchida, 1995), or using comparisons between FW- and SW-acclimated animals (Metzger et al., 2016). However, whether salinity affects thermal tolerance remains inconclusive, varying between species and studies, with some studies reporting an effect of salinity on thermal tolerance (Chen and Chen, 1999; Cheng et al., 2013; Everatt et al., 2013; Jian et al., 2003; Metzger et al., 2016; Sardella et al., 2008a,b), and others reporting no effect at all (Re et al., 2006, 2012; Haney and Walsh, 2003). Even among studies reporting an effect of salinity on thermal tolerance, there appears to be no consistency in how thermal tolerance is associated with salinity.

Anadromous fishes make a deliberate FW-to-SW migration as juveniles then return to FW as mature adults. In FW, fishes passively gain water and lose ions to the dilute environment. To counter this, they must actively uptake ions (primarily  $Na^+$  and  $Cl^-$ ) across the gill epithelium by utilizing a suite of ion transporters, a process facilitated by the electrogenic gradients produced by the activity of the basolateral  $Na^+/K^+$ -ATPase (NKA) (Marshall and Grosell, 2006). Upon exposure to SW, fishes passively lose water and gain ions in the solute-concentrated environment. To counter this, the gill epithelium transforms to actively excrete ions. This is accomplished by the transcellular transport of  $Cl^-$  ions via a basolateral  $Na^+/K^+/2Cl^-$ -cotransporter (NKCC), and an apical  $Cl^-$  channel (CFTR) and the paracellular transport of  $Na^+$  (via 'leaky' junctions in the gill

<sup>1</sup>Graduate Program in Organismic and Evolutionary Biology, University of Massachusetts, Amherst, MA 01003, USA. <sup>2</sup>US Geological Survey, Leetown Science Center, Conte Anadromous Fish Research Center, Turners Falls, MA 01376, USA.

\*Author for correspondence (cshaughnessy@umass.edu)

 C.A.S., 0000-0003-2146-9126

epithelium) (Silva et al., 1977). The excretion of these ions in SW is also highly dependent on NKA activity. Thus, to survive a transition between FW and SW (which most freshwater fish species are incapable of), the gill of anadromous fishes must transform from a primary role of ion uptake to one of salt excretion (McCormick, 2013).

In teleost fishes, cortisol acts as both a glucocorticoid and a mineralocorticoid, involved in the regulation of many physiological functions including metabolism (Mommsen et al., 1999) and osmoregulation (McCormick, 2001). Many studies in fishes have shown that cortisol increases metabolic demand and stimulates gluconeogenesis and activity of gluconeogenic enzymes (see reviews by Faught and Vijayan, 2016; Mommsen et al., 1999). In addition to its more conserved role as a glucocorticoid in teleost fishes, cortisol, along with growth hormone and insulin-like growth factor 1, acts as a mineralocorticoid by improving osmoregulation in SW and promoting the differentiation of chloride cells in the gill (McCormick, 1996, 2001). Studies in Atlantic salmon (*Salmo salar*) have shown that cortisol treatment increases gill NKA activity and SW tolerance (measured as relatively lower plasma ion concentration after SW exposure) (Bisbal and Specker, 1991; McCormick et al., 2008; Specker et al., 1994; Veillette et al., 1995). The role of cortisol in promoting osmoregulation has never been demonstrated in brook trout.

It may be that thermal tolerance is limited during (although not after) SW acclimation, when osmoregulatory status (ion and water balance) is outside its normal homeostatic range. Until now, a time-course perspective of changes in thermal tolerance during SW acclimation has not been reported. Monitoring thermal tolerance throughout SW acclimation could provide important information on the thermal sensitivities of fishes with unique osmoregulatory life histories, such as anadromous and estuarine fishes (which experience daily fluctuations in salinity), and help determine potential impacts of future warming. The brook trout is a particularly useful and interesting species in which to study this question because of (1) its wide distribution across many different climates in the United States, including many small and shallow FW systems that can experience substantial warming during summer (Meisner, 1990), (2) its facultatively anadromous life history, including a southern distribution around Long Island Sound and Cape Cod, which can reach temperatures of 25°C (US Environmental Protection Agency, 1994) and has experienced substantial population declines in the last century (Limburg and Waldman, 2009), and (3) its amenability to laboratory studies. The aims of this study were to assess whether thermal tolerance of brook trout is affected during SW acclimation and to investigate the role of cortisol in osmoregulation and thermal tolerance during SW acclimation. It was hypothesized that thermal tolerance would be limited during SW acclimation, and that improving the osmoregulatory capacity of the fish using a cortisol treatment would help maintain thermal tolerance during SW exposure.

## MATERIALS AND METHODS

### Experimental procedure

All rearing and experiments were conducted at the US Geological Survey S. O. Conte Anadromous Fish Research Center in Turners Falls, MA, USA, and were carried out in accordance with USGS Animal Care Guidelines under IACUC 9070. Sandwich State Hatchery (Sandwich, MA, USA)-raised juvenile (2 years old) brook trout (16.0±0.1 cm, 44.7±0.9 g) were held under a natural photoperiod in 1.5 m diameter tanks supplied with Connecticut River water and fed to satiation daily. One month prior to experimentation, fish were randomly assigned to 1.5 m diameter

experimental tanks containing recirculating (particle and chemical filtered), temperature-controlled (18.0±0.2°C;  $T_{acc}$ ) dechlorinated municipal water under a natural photoperiod. Fifty-percent water changes were performed every third day. Food (BioTrout, Bio-Oregon, Westbrook, ME, USA) was administered using a feed-matched (between treatments) regimen throughout experimentation. Feeding was withheld for 48 h prior to any experimentation and sampling.

### Experiment 1: $CT_{max}$ during SW acclimation

Fish were exposed to either 25 ppt salinity (hereafter referred to as 'seawater' or 'SW') or kept in FW as a control for 16 days and monitored for changes in thermal tolerance using a  $CT_{max}$  test (described below). Target salinity in all experiments was achieved using artificial sea salt (Crystal Sea Salt, Baltimore, MD, USA) by first removing 50% of the acclimation water and replacing it with 50 ppt salt water over the course of 1 h. Before SW exposure (day 0) and 2, 5 and 16 days after SW exposure, eight fish from FW and SW were removed for sampling at  $T_{acc}$  and an additional eight fish from FW and SW were transferred to 0.6 m diameter flow-through tanks maintained at respective salinities for determination of  $CT_{max}$  followed by blood and tissue collection.

$CT_{max}$  was determined by increasing the temperature of the water in each  $CT_{max}$  tank until a fish exhibited loss of equilibrium (LOE) (Becker and Genoway, 1979), at which point the fish was removed from the  $CT_{max}$  tank and immediately sampled. LOE was assessed using the most widely used LOE endpoint determination in the relevant literature, failure of righting response, which is indicative of the inability of a fish to escape conditions that would eventually lead to its death (Becker and Genoway, 1979; Beitinger et al., 2000; Lutterschmidt and Hutchison, 1997). As an objective measure in determining LOE, only a fish exhibiting LOE behavior for longer than 10 s without any effort to right itself was considered as having reached  $CT_{max}$ . Temperature in the  $CT_{max}$  tanks was increased at an initial rate of 4°C h<sup>-1</sup> for the first hour (18 to 22°C), then at a test rate of 2°C h<sup>-1</sup> thereafter until all fish had exhibited LOE. Temperature during the  $CT_{max}$  tests was controlled by allowing heated water to flow from header tanks through solenoid valves (Granzow, Inc., Charlotte, NC, USA) that were controlled by temperature controllers (Omega cn7500, Omega Engineering, Inc., Stamford, CT, USA) with a resistance thermometer input installed in each  $CT_{max}$  tank. The temperature controllers were optimized to the  $CT_{max}$  test conditions prior to experimentation. Each  $CT_{max}$  tank was provided with supplemental aeration for the duration of  $CT_{max}$  testing to ensure that oxygen levels remained at nearly saturating levels (90–100%), which is far above the levels of air saturation at which  $CT_{max}$  is reduced (Ern et al., 2016).

### Experiment 2: Effect of cortisol treatment on osmoregulation

Fish were administered one of two doses of a cortisol implant (CORT) and analyzed for gill NKA activity and plasma Cl<sup>-</sup> before and after SW exposure. Experimental water conditions were achieved as described for Experiment 1. Cortisol (Sigma-Aldrich, St Louis, MO, USA) was suspended in a 1:1 vegetable oil:shortening solution (as described in Specker et al., 1994) and warmed to ~25°C prior to injection. Fish were anesthetized with MS-222 (50 mg l<sup>-1</sup> buffered with NaHCO<sub>3</sub>, pH 7.0; Argent Laboratories, Redmond, WA, USA), weighed and injected intraperitoneally with either a 5 or 25 µl g<sup>-1</sup> body mass CORT dose or a vehicle control (VEH) using a 1 cc syringe and 25 gauge needle. Fish were sampled 6 (gill biopsy only), 12, 14 and 21 days after cortisol injection. After the sampling on day 12, all fish were transferred to SW.

### Experiment 3: Effect of cortisol treatment on $CT_{max}$

Fish were administered a 25  $\mu\text{g g}^{-1}$  CORT implant 12 days prior to SW exposure and tested for  $CT_{max}$  2 days after SW exposure (14 days after CORT injection). Experimental water conditions, CORT treatment and  $CT_{max}$  testing was achieved as described for Experiments 1 and 2.

### Sampling protocol

For terminal sampling, fish were euthanized using a lethal dose of MS-222 (100  $\text{mg l}^{-1}$  buffered with  $\text{NaHCO}_3$ , pH 7.0), measured for length and body mass, and sampled for blood, gill and white muscle. Blood was collected from the caudal vessels using 1 ml ammonium heparinized syringes (25 gauge needle) and centrifuged (3000  $g$  for 5 min at 4°C) for plasma extraction (aliquoted and stored at  $-80^\circ\text{C}$ ). Blood sampling was completed within 6 min of disturbing the tank, which is before any increase from basal cortisol levels can be detected (Wedemeyer, 1970). Additional gill tissue for immunoblotting was aliquoted and stored at  $-80^\circ\text{C}$ . White muscle tissue (~2 g) was blotted dry, weighed (wet mass) and placed in a drying oven at 60°C until it reached a stable mass (dry mass) for determination of water content.

Non-lethal gill biopsies for enzyme activity analysis (taken on day 6 of Experiment 2 only) was achieved by anesthetizing fish with MS-222 (50  $\text{mg l}^{-1}$  buffered with  $\text{NaHCO}_3$ , pH 7.0), and removing four to six filaments from above the septum on the first gill arch and storing them at  $-80^\circ\text{C}$  in 100  $\mu\text{l}$  of ice-cold SEI buffer (150  $\text{mmol l}^{-1}$  sucrose, 10  $\text{mmol l}^{-1}$  EDTA and 50  $\text{mmol l}^{-1}$  imidazole, pH 7.3), following the protocol described by McCormick (1993).

### Blood analyses

An aliquot of fresh blood was collected in a capillary tube for hematocrit (Hct) analysis, which was accomplished via centrifugation and is presented as percent packed red blood cell (RBC) volume. Plasma  $\text{Cl}^-$  was measured using a digital chloridometer (Haake Buchler Instruments Inc., Saddlebrook, NJ, USA). Plasma glucose was measured via enzymatic coupling of hexokinase and glucose-6-phosphate dehydrogenase (Stein, 1963). Plasma cortisol was measured using an enzyme immunoassay previously described (Carey and McCormick, 1998).

### Gill $\text{Na}^+/\text{K}^+$ -ATPase activity

Gill  $\text{Na}^+/\text{K}^+$ -ATPase (NKA) activity was analyzed using an NADH-linked kinetic assay in a 96-well microplate run at 25°C for 10 min, as described in McCormick (1993). Gill filaments were homogenized on ice in 150  $\mu\text{l}$  of SEID (0.1% sodium deoxycholate in SEI buffer, pH 7.3) and centrifuged at 3200  $g$  for 5 min at 4°C. The supernatant was assayed in duplicate for ATPase activity in the presence and absence of the NKA-specific inhibitor ouabain (0.5  $\text{mmol l}^{-1}$ ). NADH oxidation was determined spectrophotometrically at 340 nm, and the difference in absorbance between the inhibited and uninhibited assay mixtures was used to calculate NKA-specific activity and expressed as  $\mu\text{mol ATP mg}^{-1}$  protein  $\text{h}^{-1}$ . Protein concentration of homogenates was determined using the Pierce BCA Protein Assay (Thermo Scientific, Rockford, IL, USA). Both assays were run on a ThermoMax microplate reader using SoftMax software (Molecular Devices, San Jose, CA, USA).

### Immunoblotting

Gill heat shock protein 70 (HSP70) protein abundance was determined using a western blot as previously described

(Chadwick et al., 2015). Gill tissue homogenates were prepared and analyzed for protein content using the BCA protein assay described above. The supernatant was diluted in a 1:1 ratio with 2 $\times$  Laemmli loading buffer, heated for 15 min at 60°C, and stored at  $-80^\circ\text{C}$ . Samples were run at 10  $\mu\text{g}$  protein per lane along with a 5  $\mu\text{g}$  Precision Plus protein standard for reference on a 14% SDS-PAGE gel (Bio-Rad, Hercules, CA, USA) for electrophoretic separation, then transferred to Immobilon PVDF transfer membranes (Millipore, Bedford, MA, USA) in a transfer buffer (25  $\text{mmol l}^{-1}$  Tris, 192  $\text{mmol l}^{-1}$  glycine, pH 8.3) at 30 V overnight. The PVDF membranes were washed in phosphate-buffered saline with 0.05% Triton X-100 (PBST), blocked for 1 h at 23°C in 5% nonfat milk in PBST, washed in PBST again, then incubated for 1 h at 23°C in a 1:30,000 dilution of the HSP70 primary antibody in blocking buffer. The primary antibody is a rabbit polyclonal anti-HSP70 with no cross-reactivity with HSC70 produced from a synthetic peptide immunogen chosen from the C-terminus of salmonid HSP70 (AS05061; Agrisera, Vannas, Sweden), and has been validated and used in brook trout (Stitt et al., 2014). After primary antibody incubation, membranes were washed with PBST then incubated for 1 h at 23°C in a 1:1000 dilution of the secondary antibody (goat anti-rabbit) in blocking buffer. After secondary antibody incubation, membranes were washed with PBST, and labeling was detected via enhanced chemiluminescence (ECL) using a 1:1 mixture of ECL solution A (396  $\mu\text{mol l}^{-1}$  coumaric acid, 2.5  $\text{mmol l}^{-1}$  luminol, 100  $\text{mmol l}^{-1}$  Tris-HCl, pH 8.5) and ECL solution B (0.018%  $\text{H}_2\text{O}_2$ , 100  $\text{mmol l}^{-1}$  Tris-HCl, pH 8.5). Membranes were exposed to X-ray film (RPI, Mount Prospect, IL, USA) and digital photographs were taken of films. Band intensity was measured using ImageJ (National Institutes of Health, Bethesda, MD, USA), and protein abundance is expressed as relative band intensity. An identical pooled sample was run on each gel and used as a reference to correct for inter-blot differences.

### Calculations and statistical analyses

Condition factor was calculated as:  $(\text{body mass}/\text{length}^3)\times 100$ . Percent water content was calculated as:  $[(\text{wet mass}-\text{dry mass})\times 100]/\text{wet mass}$ . All values are presented as means $\pm$ s.e.m. and  $n=8-11$  for all group means except Experiment 1 SW day 16, where  $n=6$ . Normality and homogeneity of variance assumptions were tested using Shapiro-Wilk and Levene's tests, respectively. Student-Newman-Keuls *post hoc* analysis was used to identify significant differences between treatments after one-way (between treatment) or two-way (between treatment across time) ANOVA analyses were performed. An  $\alpha$ -value of 0.05 was selected to denote statistical significance in all analyses and all  $P$ -values are presented in figures or figure captions. Statistics and figures were completed using R statistical software (version 3.2.2, <https://www.r-project.org/>) and GraphPad Prism 6.0 (GraphPad Software, La Jolla, CA, USA).

### RESULTS

All fish remained active swimmers and in good condition throughout experimentation, except for in the final moments of  $CT_{max}$  testing, when the fish would lose equilibrium. Condition factor did not significantly differ between treatment or over time in any experiment.

#### Experiment 1: $CT_{max}$ during SW acclimation

$CT_{max}$  in FW remained stable at  $30.4\pm 0.1^\circ\text{C}$  (pooled average; 0–16 days) throughout the 16-day experiment (Fig. 1A).  $CT_{max}$  in SW was reduced at 2 and 5 days after SW exposure, reaching a

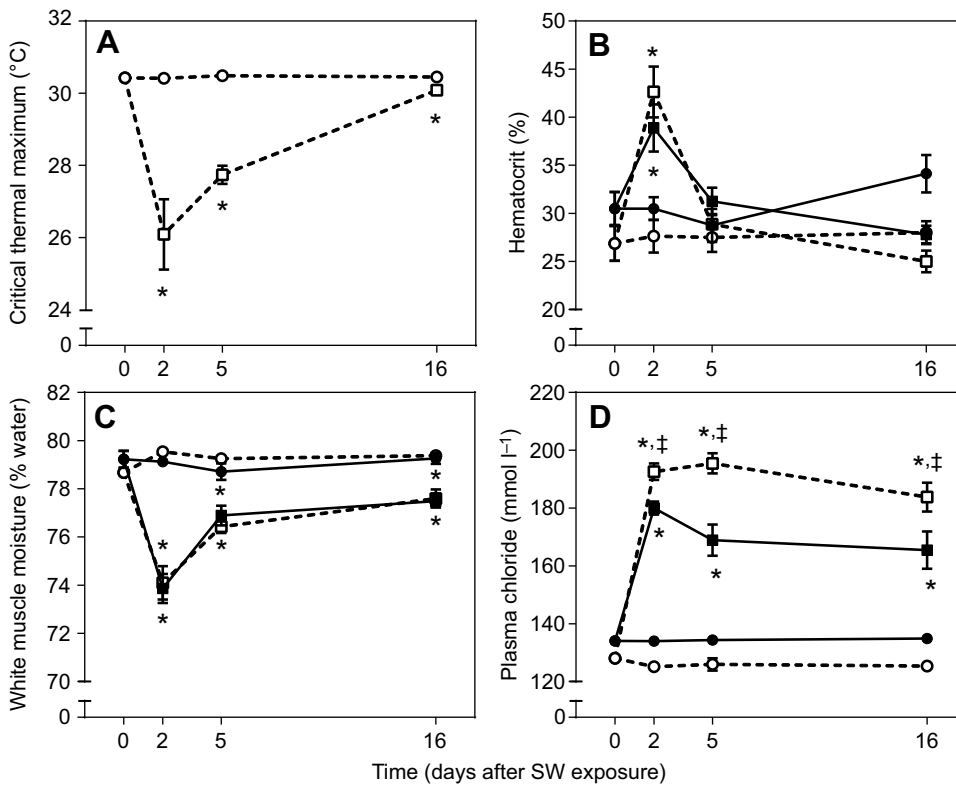

**Fig. 1. Critical thermal maximum ( $CT_{max}$ ) and ion and water balance in brook trout during seawater (SW) acclimation.** (A)  $CT_{max}$ , (B) hematocrit, (C) white muscle moisture and (D) plasma  $Cl^-$  measured in brook trout for 16 days after SW exposure: freshwater (FW) acclimation temperature ( $T_{acc}$ ; filled circles), SW  $T_{acc}$  (filled squares), FW  $CT_{max}$  (open circles) and SW  $CT_{max}$  (open squares). For A–D,  $P < 0.05$  for time, treatment and their interaction (two-way ANOVA; Student–Newman–Keuls *post hoc*). Data are presented as means  $\pm$  s.e.m.;  $n = 8$  for all groups except SW Day 16  $n = 6$ ; \*significant difference between salinity at respective time point; †significant difference within salinity at respective time point.

minimum of  $26.1 \pm 1.0^\circ\text{C}$  at 2 days, before returning to FW control levels by 16 days. At  $T_{acc}$ , Hct in FW remained stable at  $31.0 \pm 0.7\%$  (pooled average; 0–16 days), but was significantly elevated by 30% at 2 days in SW (Fig. 1B). Hct in fish at  $CT_{max}$  was similar to that from fish at  $T_{acc}$ , stable in FW and elevated at 2 days in SW. White muscle moisture at  $T_{acc}$  remained stable in FW at  $79.1 \pm 0.14\%$  water (pooled average; 0–16 days), but was significantly reduced to  $73.9 \pm 0.6\%$  water at 2 d in SW before partially recovering to a stable (although still significantly dehydrated) state at 5 and 16 days in SW (Fig. 1C). White muscle moisture data from fish at  $CT_{max}$  were nearly identical to those from fish at  $T_{acc}$ . Plasma  $Cl^-$  at  $T_{acc}$  was stable in FW at  $134.3 \pm 0.5 \text{ mmol l}^{-1}$  and significantly elevated to  $180.0 \pm 2.3 \text{ mmol l}^{-1}$  at 2 days in SW, then partially recovered to a stable (although still significantly elevated) state at 5 and 16 days (Fig. 1D). In FW, plasma  $Cl^-$  from fish at  $CT_{max}$  was 10% lower than from fish at  $T_{acc}$ , whereas in SW, plasma  $Cl^-$  from fish at  $CT_{max}$  was 10% higher than from fish at  $T_{acc}$ .

Plasma cortisol at  $T_{acc}$  remained stable in FW at  $6.9 \pm 1.2 \text{ ng ml}^{-1}$  (pooled average; 0–16 d) and was significantly elevated by 20-fold to  $115.1 \pm 29.6 \text{ ng ml}^{-1}$  in SW at 2 days (Fig. 2A). Exposure to high temperature during  $CT_{max}$  did appear to slightly elevate (threefold) plasma cortisol in both FW and SW fish. By day 5, plasma cortisol in fish in SW at  $T_{acc}$  had returned to FW  $T_{acc}$  levels, but plasma cortisol in fish in SW reaching  $CT_{max}$  still remained significantly elevated above fish in all other groups. By 16 days, plasma cortisol in all treatments had returned to control levels. At  $T_{acc}$ , plasma glucose in FW remained stable at  $4.1 \pm 0.2 \text{ mmol l}^{-1}$  (pooled average; 0–16 days) and was transiently elevated threefold to  $13.2 \pm 2.2 \text{ mmol l}^{-1}$  at 2 days in SW (Fig. 2B). Reaching  $CT_{max}$  elevated plasma glucose by twofold in FW fish. Gill NKA activity remained stable in FW at  $1.81 \pm 0.17$  (pooled average; 0–16 days), but steadily and significantly increased throughout SW acclimation by fourfold (Fig. 2C). In fish at  $CT_{max}$ , gill NKA activity did not

differ from fish at  $T_{acc}$ . Gill HSP70 was not detected in any fish at  $T_{acc}$  and no significant differences were detected between FW and SW fish at  $CT_{max}$  over the 16 day experiment (Fig. 2D).

### Experiment 2: CORT treatment on osmoregulation

By 12 d following CORT injection, plasma cortisol in the VEH group was  $21.5 \pm 14.2 \text{ ng ml}^{-1}$  and was elevated approximately fourfold in  $5 \mu\text{g g}^{-1}$  CORT fish and  $\sim 10$ -fold in  $25 \mu\text{g g}^{-1}$  CORT fish (Fig. 3A). Compared with VEH fish, gill NKA activity at 6 and 12 days after CORT injection was not elevated in the  $5 \mu\text{g g}^{-1}$  CORT fish, but was significantly elevated 1.5-fold in  $25 \mu\text{g g}^{-1}$  CORT fish after 12 d (Fig. 3B). After SW exposure, gill NKA activity increased in all fish, but the increase in activity was greatest in  $25 \mu\text{g g}^{-1}$  CORT fish. At 2 d in SW, plasma  $Cl^-$  had increased by 40% in VEH fish, but only 15% in  $5 \mu\text{g g}^{-1}$  CORT fish and 10% in  $25 \mu\text{g g}^{-1}$  CORT fish (Fig. 3C).

### Experiment 3: CORT treatment on $CT_{max}$

In FW,  $CT_{max}$  ( $\sim 29^\circ\text{C}$ ) did not differ between VEH and CORT fish (Fig. 4A). At 2 days in SW,  $CT_{max}$  was significantly reduced in VEH fish to  $27.1 \pm 0.6^\circ\text{C}$ . However,  $CT_{max}$  in CORT fish in SW was  $28.6 \pm 0.3^\circ\text{C}$  and was not significantly reduced below FW controls. As plasma  $Cl^-$  is altered by reaching  $CT_{max}$  (Fig. 1D), the mean  $CT_{max}$  values for each experimental group were regressed with mean plasma  $Cl^-$  values of fish in  $T_{acc}$  under identical experimental treatment conditions as the  $CT_{max}$  fish.  $CT_{max}$  was significantly negatively correlated with plasma  $Cl^-$  [ $n = 4$ , slope ( $m$ ) =  $-0.034$ ,  $r^2 = 0.96$ ,  $P = 0.022$ ; Fig. 4B] and significantly positively associated with white muscle moisture ( $n = 41$ ,  $m = 0.212$ ,  $r^2 = 0.60$ ,  $P < 0.001$ ; Fig. 4C).

### DISCUSSION

Brook trout in this study experienced an elevation in plasma  $Cl^-$  and a dehydration of the white muscle immediately following SW

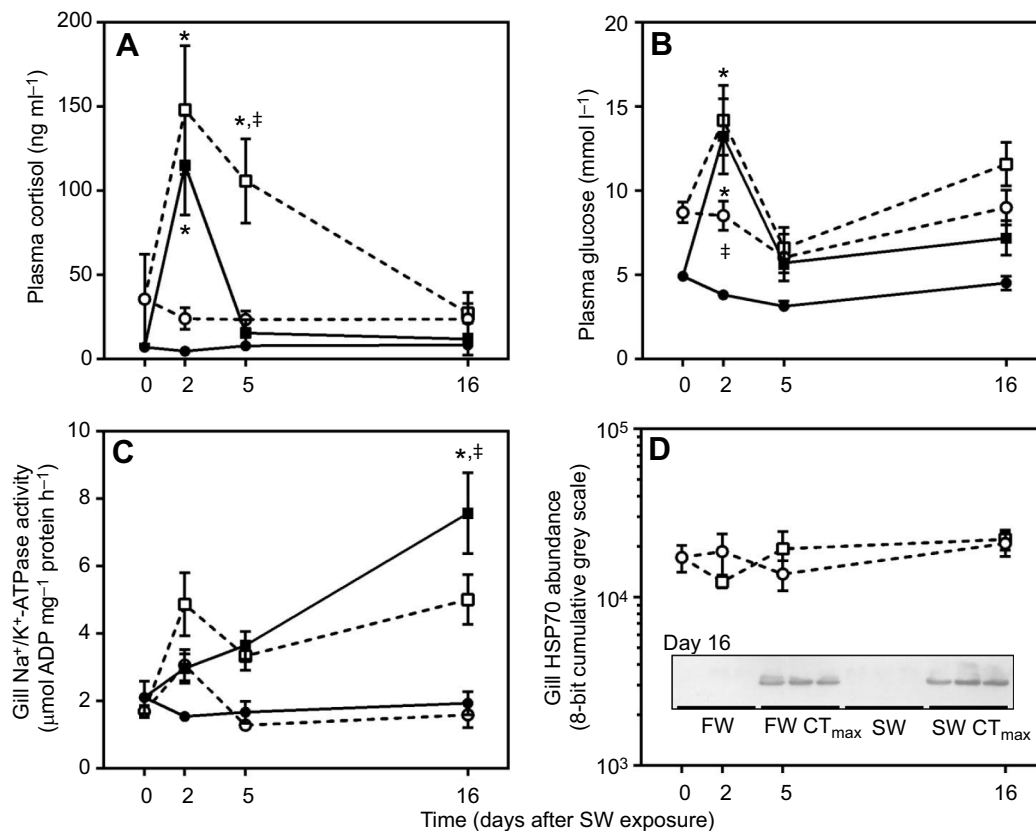

**Fig. 2. Physiological responses of brook trout during SW acclimation and acute thermal tolerance testing.** Plasma cortisol (A) and glucose (B), and gill  $\text{Na}^+/\text{K}^+$ -ATPase activity (C) and HSP70 abundance (D) measured in brook trout for 16 days after SW exposure: FW  $T_{\text{acc}}$  (filled circles), SW  $T_{\text{acc}}$  (filled squares), FW  $\text{CT}_{\text{max}}$  (open circles) and SW  $\text{CT}_{\text{max}}$  (open squares). For A–C,  $P < 0.05$  for time, treatment and interaction (two-way ANOVA; Student–Newman–Keuls *post hoc*); for D, no significant effects were detected. Data are presented as means  $\pm$  s.e.m.; \*significant difference between salinities at respective time point; †significant difference within salinity at respective time point.

exposure, then recovered both of these indicators of osmoregulatory status back to stable states nearer to FW control values. This recovery of ion and water balance in SW followed a transient elevation in circulating cortisol concentration, the mobilization of glucose and an increase in gill NKA activity. Taken together, this is a well-documented pattern of SW acclimation by euryhaline fishes (Kultz, 2015; Marshall and Grosell, 2006; McCormick, 2001). Unique to this study are (1) a description of a transient reduction in thermal tolerance during SW acclimation, (2) a demonstration of the role of cortisol in osmoregulation in this species and (3) an association of osmoregulation with thermal tolerance.

Determination of  $\text{CT}_{\text{max}}$  as an indicator of thermal tolerance in ectotherms is a widely used method represented in an enormous body of literature (Beitinger et al., 2000; Lutterschmidt and Hutchison, 1997). This method estimates the maximum temperature an organism can tolerate by acutely increasing the temperature at a constant rate slow enough that a particular  $T_{\text{LOE}}$  can be identified but rapid enough to avoid acclimation by the test subject. The  $2^\circ\text{C h}^{-1}$  rate used in the present study was slower than the rates used in other  $\text{CT}_{\text{max}}$  tests, which range between 1 and  $60^\circ\text{C h}^{-1}$  (Becker and Genoway, 1979; Beitinger et al., 2000; Lutterschmidt and Hutchison, 1997). This slower rate was used for several reasons: (1) it was closer to ecologically relevant temperatures and fluctuations in temperature that a fish might experience in the wild (see Chadwick et al., 2015), (2) it was rapid enough to perform in a single day to resolve day-to-day changes in thermal tolerance during SW acclimation and (3) it resulted in

consistency in control groups and repeatability between experiments.

In Experiment 1 (Figs 1 and 2),  $\text{CT}_{\text{max}}$  in FW remained stable at  $\sim 30.5^\circ\text{C}$  throughout the 16 day experiment. This result agrees with a previous estimate of thermal tolerance in brook trout of  $29.8 \pm 0.4^\circ\text{C}$  reported by Lee and Rinne (1980) using a  $\text{CT}_{\text{max}}$  rate of  $1.2^\circ\text{C h}^{-1}$ , and falls within the range of estimates for members of the family Salmonidae of  $26\text{--}33^\circ\text{C}$  (Beitinger et al., 2000). Perhaps the most interesting finding of the present study is that upon SW exposure, thermal tolerance significantly declined to  $\sim 26^\circ\text{C}$  at 2 days before recovering to FW control levels by 16 days. This pattern of decline and recovery of thermal tolerance tracked changes in other parameters analyzed: plasma  $\text{Cl}^-$ , white muscle water content and Hct all remained stable in FW but significantly deviated from a stable state at 2 days in SW. This apparent synchrony in osmoregulatory status and thermal tolerance during SW acclimation suggests that these are associated in some way. It is particularly interesting that thermal tolerance is transiently affected by salinity because this may explain some of the inconsistencies in the literature regarding salinity effects on thermal tolerance (as described earlier, see Introduction). The timing of how salinity affects thermal tolerance clearly matters, but has not been addressed in studies investigating salinity effects on thermal tolerance.

An interesting finding of Experiment 1 was that, in contrast to the large increases in gill HSP70 abundance observed after the heat stress of the  $\text{CT}_{\text{max}}$  test, there was no detectable increase of gill HSP70 from osmotic stress over the 16 days following SW exposure

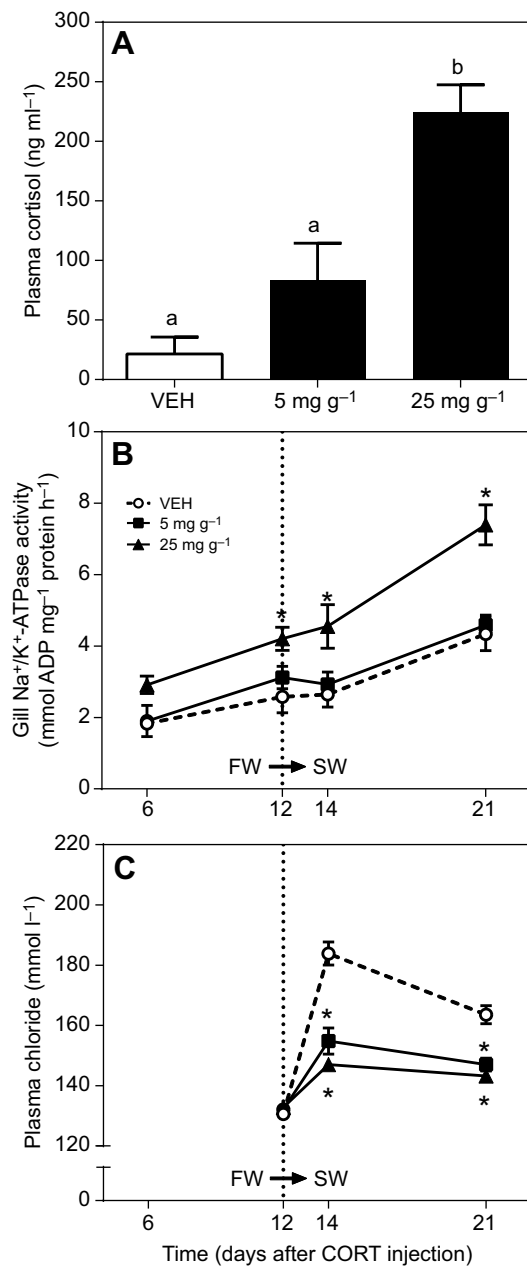

**Fig. 3. Osmoregulation in brook trout during SW acclimation following cortisol treatment.** (A) Plasma cortisol, (B) gill Na<sup>+</sup>/K<sup>+</sup>-ATPase activity and (C) plasma chloride measured at 6, 12, 14 and/or 21 days after a cortisol injection (CORT) of 5  $\mu\text{g g}^{-1}$  (filled squares) or 25  $\mu\text{g g}^{-1}$  (filled triangles), or injection with a vehicle control (VEH; open circles). Data are presented as means  $\pm$  s.e.m.;  $n=8-10$  for all groups; letters indicate significance; \*significant difference from VEH. Dotted line indicates FW-to-SW exposure.

(Fig. 2D). Many studies have investigated the response and regulation of HSP70 expression in response to heat stress in fishes (Basu et al., 2001; Deane and Woo, 2011; Iwama et al., 1999), but far fewer have seen an HSP70 response to osmotic challenges. Metzger et al. (2016) compared transcription of isoforms of *hsp70* in heat shocked marine and freshwater stickleback following salinity acclimation and acute salinity transfer. They observed a more rapid transcriptional response for *hsp70-2* than *hsp70-1* after heat shock from 18 to 28°C, and a general trend of higher *hsp70-1* transcription in fish acclimated to 2 ppt than fish in 20 ppt after heat shock. Smith et al. (1999) showed an increase in HSP70 abundance

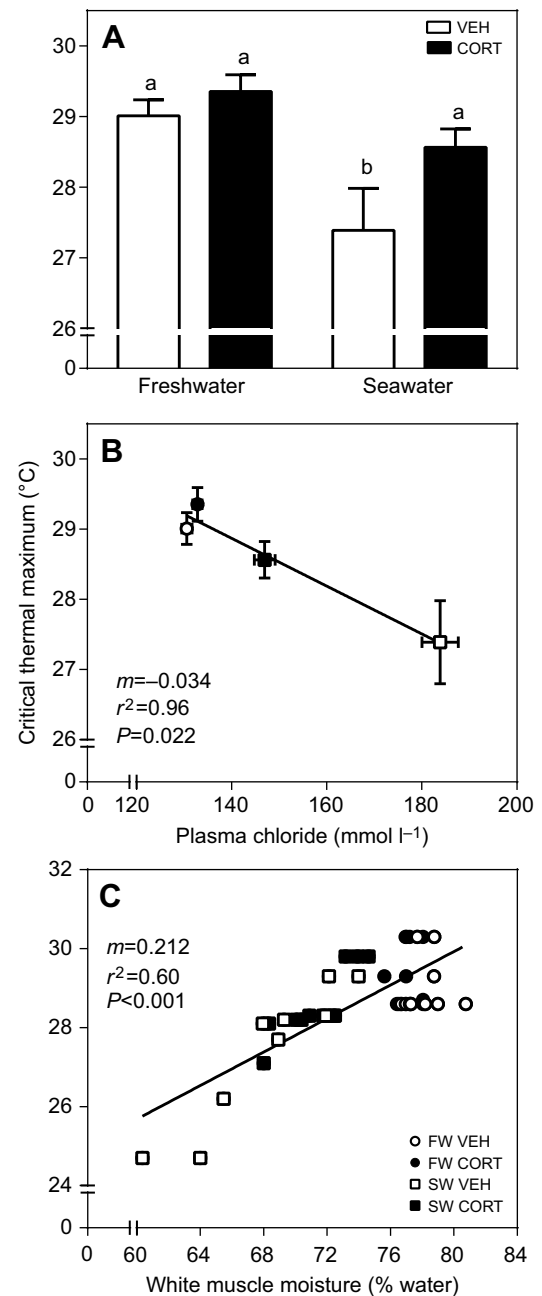

**Fig. 4. CT<sub>max</sub> in brook trout following cortisol treatment and SW exposure.** (A) CT<sub>max</sub>, (B) plasma Cl<sup>-</sup> and (C) white muscle moisture measured 2 days after SW exposure (squares) or in a FW control (circles) in fish treated with either a 25  $\mu\text{g g}^{-1}$  cortisol treatment (CORT; filled symbols) or a vehicle control (VEH; open symbols) 12 days prior to SW exposure. Data in A are presented as means  $\pm$  s.e.m. ( $n=10-11$ ), with letters indicating significance (two-way ANOVA; Student–Newman–Keuls *post hoc*). In B, mean CT<sub>max</sub> data are regressed with mean plasma Cl<sup>-</sup> data of fish at  $T_{acc}$  ( $n=4$ ). In C, individual CT<sub>max</sub> and white muscle moisture data are presented ( $n=41$ ).

in isolated Atlantic salmon branchial lamellae after a hypersaline exposure *in vitro*, and Deane et al. (2002) showed an increase in hepatic HSP70 in black sea bream acclimated to elevated salinity. Additionally, heat shock treatments have been shown to improve survival of Atlantic salmon (DuBeau et al., 1998) and improve ion homeostasis of rainbow trout (Niu et al., 2008) after transfer to hypersaline water. The term ‘cross-tolerance’ refers to the phenomenon in which a physiological response to one stressor

confers protection against an additional stressor. The mechanism of cross-tolerance between heat stress and osmotic challenge remains unclear, but may involve the moderation of effects of cellular dehydration by HSP-mediated changes to protein stability, folding or solubility (DuBeau et al., 1998). The HSP70 data in the present study show no evidence for an upregulation in gill HSP70 abundance from salinity exposure or cross-tolerance between osmotic and heat stresses, and thus explain neither the reduction nor recovery of thermal tolerance throughout SW acclimation. It is worth mentioning that in the present study we have only examined one member of the HSP family and only at one time point upon heat exposure (at  $CT_{max}$ ), and because other induced or constitutively expressed HSPs such as HSP90 or HSC70 may be involved, we have a limited ability to make firm conclusions about cross-tolerance.

This is the first work to demonstrate the role of cortisol in osmoregulation in this species. The increased plasma cortisol from CORT treatment resulted in elevated gill NKA activity and improved osmoregulatory performance in SW (Fig. 3). Exogenous cortisol treatment has been shown to promote SW tolerance in Atlantic salmon and many other species (Bisbal and Specker, 1991; Foskett, 1977; McCormick et al., 2008; Singer et al., 2003; Specker et al., 1994; Veillette et al., 1995), as well as to promote many of the underlying mechanisms for salt excretion, including increasing the abundance of NKA, NKCC and CFTR (reviewed in Marshall and Grosell, 2006). In the present study, the dose of CORT treatment appeared to impact gill NKA activity and SW tolerance differently. Whereas the  $5 \mu\text{g g}^{-1}$  CORT dose appeared to have no effect on gill NKA activity, gill NKA activity was significantly elevated in the  $25 \mu\text{g g}^{-1}$  CORT dose prior to SW exposure and appeared to be more responsive than in VEH fish after SW exposure. It is interesting that, by contrast, SW tolerance was improved by a similar magnitude in both CORT doses. McCormick et al. (2008) made a similar finding when gill NKA activity was elevated by a 50 but not  $10 \mu\text{g g}^{-1}$  CORT dose in Atlantic salmon, yet SW tolerance was improved by both doses. This may indicate that components of ion and water balance other than gill NKA activity may be more responsive to cortisol.

In addition to improving SW tolerance, CORT treatment improved thermal tolerance in SW-exposed fish and had no effect in FW-exposed fish. Plasma  $\text{Cl}^-$  and white muscle water content were associated with  $CT_{max}$  across salinity and hormone treatments (Fig. 4). Together, these findings support a hypothesis that decreased thermal tolerance after SW exposure is associated with higher plasma  $\text{Cl}^-$  and lower white muscle moisture. Determining the mechanism of the interaction between osmoregulatory status and thermal tolerance undoubtedly requires further investigation, but some possible explanations may be gleaned from this study.

The factors limiting thermal tolerance in fishes have been widely discussed (Clark et al., 2013a,b; Farrell, 2009, 2013; Jutfelt et al., 2014; Pörtner, 2001, 2014; Pörtner and Giomi, 2013; Pörtner and Knust, 2007; Schulte, 2015). A leading hypothesis that has emerged states that at elevated temperatures, along with increases in standard metabolic rate and  $\text{O}_2$  consumption,  $\text{O}_2$  uptake and delivery is limited, resulting in a decrease in oxygen availability ('aerobic scope') for other metabolically demanding physiological processes, such as locomotion, growth, reproduction and osmoregulation (discussed in detail below). Although this hypothesis has been criticized for failing to explain thermal tolerance in many species (Clark et al., 2013a; Gräns et al., 2014; Norin et al., 2014), it appears to at least partially explain acute thermal tolerance in trout (Keen and Gamperl, 2012).

The transient reduction in thermal tolerance during SW acclimation observed in the present study may be the result of reduced  $\text{O}_2$  availability. In rainbow trout, acclimation to elevated salinity increases  $\text{O}_2$  consumption, decreases arterial and venous blood  $\text{O}_2$  tension, and increases blood lactate levels within 24 h (Maxime et al., 1991). If the brook trout in the present study experienced a similar decrease in oxygen availability owing to an increase in metabolic demand whilst acclimating to SW, this may have limited the ability of these fish to tolerate the increasing metabolic load from the rising temperature during the  $CT_{max}$  test, leading to a lower observed  $CT_{max}$  at 2 days in SW. If basal metabolic rate and arterial and venous  $\text{O}_2$  availability return to homeostatic levels once the fish fully acclimate to SW, this may explain the recovery of thermal tolerance at 16 days in SW.

Another possible explanation for the reduction in thermal tolerance at 2 days in SW may be related to rheological properties of the blood affecting  $\text{O}_2$  transport. SW exposure transiently elevated Hct in the present study (Fig. 1B), but no hematological analyses were performed to determine whether this increase in Hct was the result of an increase in the number or cell volume of erythrocytes. Dehydration associated with SW exposure would likely reduce RBC size, so the increase in Hct at 2 days in SW may be due to an increase in RBC production to counter any reduced  $\text{O}_2$  transport capacity. Blood viscosity is known to increase with Hct (Fletcher and Haedrich, 1987) and increase the work needed to be performed by the heart, reducing cardiac output and  $\text{O}_2$  transport (Wells and Weber, 1991). If thermal tolerance is related to  $\text{O}_2$  delivery, as has been suggested, then a potential decrease in cardiac output owing to elevated Hct may result in the reduced thermal tolerance observed in the present study. In rainbow trout, optimum blood  $\text{O}_2$  transport capacity occurs at a Hct of 30% packed cell volume, and is reduced by one-fifth when Hct is 40% (Wells and Weber, 1991). In the present study, FW brook trout had a Hct around 30%, but by day 2 in SW, Hct had transiently increased to nearly 40% ( $38.9 \pm 2.4\%$ ). Additionally, it has been suggested that cardiac arrhythmia during warming occurs because of a lack of  $\text{O}_2$  supply to the highly metabolically active myocardium (Clark et al., 2008) and that this coincides with upper thermal limit in salmon (Casselman et al., 2012; Clark et al., 2008) and rainbow trout (Verhille et al., 2013). It could be that if the heart was working harder during a state of elevated Hct at 2 days in SW, the switch to anaerobic metabolism (and onset of arrhythmias) in the myocardium during warming would have occurred at lower temperatures, leading to the reduced observed  $CT_{max}$ . These speculations about Hct effecting thermal tolerance, however, cannot explain why thermal tolerance was still reduced at 5 days in SW, when Hct had already fully recovered.

A third possible explanation for the transient reduction in thermal tolerance during SW exposure may be that either plasma ion concentration or a transient metabolic acidosis after SW exposure affects  $\text{O}_2$  binding kinetics of hemoglobin. In an early study in trout on the effects of anion concentrations on oxygen affinity, both hemoglobin types HbI and HbII appeared to have reduced affinity for  $\text{O}_2$  under increased  $\text{Cl}^-$  concentrations (Brunori et al., 1975). Maxime et al. (1991) observed a decrease in Hb- $\text{O}_2$  binding affinity (increase in  $P_{50}$ ) in rainbow trout exposed to SW for 24 h and suggested that it could be the result of a metabolic acidosis (decrease in arterial pH) that was also observed. In more recent studies, exposure of rainbow trout to hyperosmotic conditions resulted in a similar metabolic acidosis and reduction in Hb- $\text{O}_2$  binding affinity (Brauner et al., 2002; Jensen et al., 2002), and the decrease in RBC intracellular pH was highly correlated with an increase in  $P_{50}$  (Brauner et al., 2002). Although blood pH was not measured in the

present study, it can be surmised that a transient metabolic acidosis after SW exposure may have reduced O<sub>2</sub> binding affinity in the blood of the brook trout and led to the reduced CT<sub>max</sub> at 2 and 5 days after SW exposure. More hematological work producing O<sub>2</sub> equilibrium curves using salmonid RBCs under a variety of osmolality conditions is needed to address this question.

A comparative approach may be useful in learning more about this unique sensitivity to temperature during SW acclimation, and clarifying some of the questions which arise from this finding. For instance, does thermal sensitivity vary with SW tolerance among anadromous fishes, i.e. would an anadromous fish that does not experience large increases in SW tolerance during development (such as Arctic charr) experience a greater reduction in thermal tolerance during SW acclimation than an anadromous fish that does increase SW tolerance during development (such as Atlantic salmon do during smolting)? From the data presented in this study, it appears that a critical consideration in addressing questions such as these is observing transient changes in thermal tolerance during SW exposure in addition to comparing FW- and SW-acclimated fishes.

### Conclusions

Unique to this study are the description of a transient reduction in thermal tolerance during SW acclimation, the demonstration of the role of cortisol in improving osmoregulation in SW in this species, and the association of elevated plasma Cl<sup>-</sup> and reduced white muscle water content with reduced thermal tolerance during SW acclimation. This paper highlights the importance of understanding the thermal experience of anadromous fishes considering their relatively unique life history of moving between FW and SW. This paper also reveals an opportunity to better understand salinity effects on thermal tolerance in general, which is important considering anticipated future water warming and variability across freshwater and marine environments.

### Acknowledgements

We would like to thank past and current members of our lab, E. Sgarlat, A. Weinstock, A. Regish, L. Vargas-Chacoff, C. Bennett and S. Chicoine, for their support and assistance in sampling fish and analyzing tissue.

### Competing interests

The authors declare no competing or financial interests.

### Author contributions

Conceptualization: C.A.S., S.D.M.; Methodology: C.A.S., S.D.M.; Validation: C.A.S.; Formal analysis: C.A.S.; Investigation: C.A.S., S.D.M.; Resources: S.D.M.; Data curation: C.A.S.; Writing - original draft: C.A.S.; Writing - review & editing: C.A.S., S.D.M.; Supervision: S.D.M.; Project administration: S.D.M.; Funding acquisition: S.D.M.

### Funding

This work was supported by U.S. Geological Survey funding to S.D.M.

### References

Barrionuevo, W. R. and Femandes, M. N. (1995). Critical thermal maxima and minima for curimatá, *Prochilodus scrofa* Steindachner, of two different sizes. *Aquac. Res.* **26**, 447-450.

Basu, N., Nakano, T., Grau, E. G. and Iwama, G. K. (2001). The effects of cortisol on heat shock protein 70 levels in two fish species. *Gen. Comp. Endocrinol.* **124**, 97-105.

Basu, N., Todgham, A. E., Ackerman, P. A., Bibeau, M. R., Nakano, K., Schulte, P. M. and Iwama, G. K. (2002). Heat shock protein genes and their functional significance in fish. *Gene* **295**, 173-183.

Becker, C. D. and Genoway, R. G. (1979). Evaluation of the critical thermal maximum for determining thermal tolerance of freshwater fish. *Environ. Biol. Fishes* **4**, 245-256.

Beitinger, T. L., Bennett, W. A. and McCauley, R. W. (2000). Temperature tolerances of North American freshwater fishes exposed to dynamic changes in temperature. *Environ. Biol. Fishes* **58**, 237-275.

Berrigan, D. and Charnov, E. L. (1994). Reaction norms for age and size at maturity in response to temperature: a puzzle for life historians. *Oikos* **70**, 474-478.

Bisbal, G. A. and Specker, J. L. (1991). Cortisol stimulates hypo-osmoregulatory ability in Atlantic salmon, *Salmo salar* L. *J. Fish Biol.* **39**, 421-432.

Brauner, C. J., Wang, T. and Jensen, F. B. (2002). Influence of hyperosmotic shrinkage and beta-adrenergic stimulation on red blood cell volume regulation and oxygen binding properties in rainbow trout and carp. *J. Comp. Physiol. B* **172**, 251-262.

Brunori, M., Falcioni, G., Fortuna, G. and Giardina, B. (1975). Effect of anions on the oxygen binding properties of the hemoglobin components from trout (*Salmo irideus*). *Arch. Biochem. Biophys.* **168**, 512-519.

Carey, J. B. and McCormick, S. D. (1998). Atlantic salmon smolts are more responsive to an acute handling and confinement stress than parr. *Aquaculture* **168**, 237-253.

Casselman, M. T., Anttila, K. and Farrell, A. P. (2012). Using maximum heart rate as a rapid screening tool to determine optimum temperature for aerobic scope in Pacific salmon *Oncorhynchus* spp. *J. Fish Biol.* **80**, 358-377.

Chadwick, J. G., Jr, Nislow, K. H. and McCormick, S. D. (2015). Thermal onset of cellular and endocrine stress responses correspond to ecological limits in brook trout, an iconic cold-water fish. *Conserv. Physiol.* **3**, cov017.

Chen, J.-C. and Chen, W.-C. (1999). Temperature tolerance of *Halotis diversicolor supertexta* at different salinity and temperature levels. *Comp. Biochem. Physiol. A Mol. Integr. Physiol.* **124**, 73-80.

Cheng, S.-Y., Chen, C.-S. and Chen, J.-C. (2013). Salinity and temperature tolerance of brown-marbled grouper *Epinephelus fuscoguttatus*. *Fish Physiol. Biochem.* **39**, 277-286.

Clark, T. D., Sandblom, E., Cox, G. K., Hinch, S. G. and Farrell, A. P. (2008). Circulatory limits to oxygen supply during an acute temperature increase in the Chinook salmon (*Oncorhynchus tshawytscha*). *Am. J. Physiol. Regul. Integr. Comp. Physiol.* **295**, R1631-R1639.

Clark, T. D., Sandblom, E. and Jutfelt, F. (2013a). Aerobic scope measurements of fishes in an era of climate change: respirometry, relevance and recommendations. *J. Exp. Biol.* **216**, 2771-2782.

Clark, T. D., Sandblom, E. and Jutfelt, F. (2013b). Response to Farrell and to Pörtner and Giomi. *J. Exp. Biol.* **216**, 4495-4497.

Clarke, A. and Johnston, N. M. (1999). Scaling of metabolic rate with body mass and temperature in teleost fish. *J. Anim. Ecol.* **68**, 893-905.

Currie, R. J., Bennett, W. A. and Beitinger, T. L. (1998). Critical thermal minima and maxima of three freshwater game-fish species acclimated to constant temperatures. *Environ. Biol. Fishes* **51**, 187-200.

Deane, E. E. and Woo, N. Y. S. (2011). Advances and perspectives on the regulation and expression of piscine heat shock proteins. *Rev. Fish Biol. Fish.* **21**, 153-185.

Deane, E. E., Kelly, S. P., Luk, J. C. Y. and Woo, N. Y. S. (2002). Chronic salinity adaptation modulates hepatic heat shock protein and insulin-like growth factor 1 expression in black sea bream. *Mar. Biotechnol.* **4**, 193-205.

DuBeau, S. F., Pan, F., Tremblay, G. C. and Bradley, T. M. (1998). Thermal shock of salmon *in vivo* induces the heat shock protein hsp 70 and confers protection against osmotic shock. *Aquaculture* **168**, 311-323.

Elliott, J. M. and Elliott, J. A. (1995). The effect of the rate of temperature increase on the critical thermal maximum for parr of Atlantic salmon and brown trout. *J. Fish Biol.* **47**, 917-919.

Ern, R., Norin, T., Gamperl, A. K. and Esbaugh, A. J. (2016). Oxygen dependence of upper thermal limits in fishes. *J. Exp. Biol.* **219**, 3376-3383.

Everatt, M. J., Worland, M. R., Convey, P., Bale, J. S. and Hayward, S. A. L. (2013). The impact of salinity exposure on survival and temperature tolerance of the Antarctic collembolan *Cryptopygus antarcticus*. *Physiol. Entomol.* **38**, 202-210.

Fangue, N. A., Hofmeister, M. and Schulte, P. M. (2006). Intraspecific variation in thermal tolerance and heat shock protein gene expression in common killifish, *Fundulus heteroclitus*. *J. Exp. Biol.* **209**, 2859-2872.

Farrell, A. P. (2009). Environment, antecedents and climate change: lessons from the study of temperature physiology and river migration of salmonids. *J. Exp. Biol.* **212**, 3771-3780.

Farrell, A. P. (2013). Aerobic scope and its optimum temperature: clarifying their usefulness and limitations – correspondence on *J. Exp. Biol.* **216**, 4493-4494.

Faught, E. and Vijayan, M. M. (2016). Mechanisms of cortisol action in fish hepatocytes. *Comp. Biochem. Physiol. B Biochem. Mol. Biol.* **199**, 136-145.

Fletcher, G. L. and Haedrich, R. T. (1987). Rheological properties of rainbow trout blood. *Can. J. Zool.* **65**, 879-883.

Foskett, J. K. (1977). Osmoregulation in the larvae and adults of the grassid crab *Sesarma reticulatum* Say. *Biol. Bull.* **153**, 505-526.

Gillooly, J. F., Brown, J. H., West, G. B., Savage, V. M. and Charnov, E. L. (2001). Effects of size and temperature on metabolic rate. *Science* **293**, 2248-2251.

Gräns, A., Jutfelt, F., Sandblom, E., Jönsson, E., Wiklander, K., Seth, H., Olsson, C., Dupont, S., Ortega-Martinez, O., Einarsdottir, I. et al. (2014). Aerobic scope fails to explain the detrimental effects on growth resulting from warming and elevated CO<sub>2</sub> in Atlantic halibut. *J. Exp. Biol.* **217**, 711-717.



- Gunderson, A. R. and Stillman, J. H.** (2015). Plasticity in thermal tolerance has limited potential to buffer ectotherms from global warming. *Proc. Biol. Sci.* **282**, 20150401.
- Haney, D. C. and Walsh, S. J.** (2003). Influence of salinity and temperature on the physiology of *Limia melanonotata* (Cyprinodontiformes: Poeciliidae): a search for abiotic factors limiting insular distribution in Hispaniola. *Caribb. J. Sci.* **39**, 327-337.
- Healy, T. M. and Schulte, P. M.** (2012a). Factors affecting plasticity in whole-organism thermal tolerance in common killifish (*Fundulus heteroclitus*). *J. Comp. Physiol. B* **182**, 49-62.
- Healy, T. M. and Schulte, P. M.** (2012b). Thermal acclimation is not necessary to maintain a wide thermal breadth of aerobic scope in the common killifish (*Fundulus heteroclitus*). *Physiol. Biochem. Zool.* **85**, 107-119.
- Iwama, G. K., Vijayan, M. M., Forsyth, R. B. and Ackerman, P. A.** (1999). Heat shock proteins and physiological stress in fish. *Am. Zool.* **39**, 901-909.
- Jensen, F. B., Lecklin, T., Busk, M., Bury, N. R., Wilson, R. W., Wood, C. M. and Grosell, M.** (2002). Physiological impact of salinity increase at organism and red blood cell levels in the European flounder (*Platichthys flesus*). *J. Exp. Mar. Biol. Ecol.* **274**, 159-174.
- Jian, C.-Y., Cheng, S.-Y. and Chen, J.-C.** (2003). Temperature and salinity tolerances of yellowfin sea bream, *Acanthopagrus latus*, at different salinity and temperature levels. *Aquac. Res.* **34**, 175-185.
- Jonsson, B. and Jonsson, N.** (2009). A review of the likely effects of climate change on anadromous Atlantic salmon *Salmo salar* and brown trout *Salmo trutta*, with particular reference to water temperature and flow. *J. Fish Biol.* **75**, 2381-2447.
- Jutfelt, F., Gräns, A., Jönsson, E., Wiklander, K., Seth, H., Olsson, C., Dupont, S., Ortega-Martinez, O., Sundell, K., Axelsson, M. et al.** (2014). Response to "How and how not to investigate the oxygen and capacity limitation of thermal tolerance (OCLTT) and aerobic scope – remarks on the article by Gräns et al.". *J. Exp. Biol.* **217**, 4432-4435.
- Keen, A. N. and Gamperl, A. K.** (2012). Blood oxygenation and cardiorespiratory function in steelhead trout (*Oncorhynchus mykiss*) challenged with an acute temperature increase and zatebradine-induced bradycardia. *J. Therm. Biol.* **37**, 201-210.
- Kultz, D.** (2015). Physiological mechanisms used by fish to cope with salinity stress. *J. Exp. Biol.* **218**, 1907-1914.
- Lee, R. M. and Rinne, J. N.** (1980). Critical thermal maxima of five trout species in the Southwestern United States. *Trans. Am. Fish. Soc.* **109**, 632-635.
- Limburg, K. E. and Waldman, J. R.** (2009). Dramatic declines in North Atlantic diadromous fishes. *Bioscience* **59**, 955-965.
- Lutterschmidt, W. I. and Hutchison, V. H.** (1997). The critical thermal maximum: history and critique. *Candian J. Zool.* **75**, 1561-1574.
- Madeira, D., Narciso, L., Cabral, H. N., Vinagre, C. and Diniz, M. S.** (2013). Influence of temperature in thermal and oxidative stress responses in estuarine fish. *Comp. Biochem. Physiol. A Mol. Integr. Physiol.* **166**, 237-243.
- Marshall, W. S. and Grosell, M.** (2006). Ion transport, osmoregulation, and acid-base balance. In *The Physiology of Fishes*, 3rd edn (ed. D. H. Evans and J. B. Claiborne), pp. 177-210. Boca Raton, FL: Taylor and Francis Group.
- Maxime, V., Pennec, J.-P. and Peyraud, C.** (1991). Effects of direct transfer from freshwater to seawater on respiratory and circulatory variables and acid-base status in rainbow trout. *J. Comp. Physiol. B* **161**, 557-568.
- McCormick, S. D.** (1993). Methods for non-lethal gill biopsy and measurement of Na<sup>+</sup>,K<sup>+</sup>-ATPase activity. *Can. J. Fish. Aquat. Sci.* **50**, 656-658.
- McCormick, S. D.** (1996). Effects of growth hormone and insulin-like growth factor I on salinity tolerance and gill Na<sup>+</sup>,K<sup>+</sup>-ATPase in Atlantic salmon (*Salmo salar*): interaction with cortisol. *Gen. Comp. Endocrinol.* **101**, 3-11.
- McCormick, S. D.** (2001). Endocrine control of osmoregulation in teleost fish. *Am. Zool.* **41**, 781-794.
- McCormick, S. D.** (2013). Smolt physiology and endocrinology. In *Fish Physiology*, Vol. 32, *Euryhaline Fishes* (ed. S. D. McCormick, A. P. Farrell and C. J. Brauner), pp. 199-251. New York: Academic Press.
- McCormick, S. D., Regish, A., O'Dea, M. F. and Shrimpton, J. M.** (2008). Are we missing a mineralocorticoid in teleost fish? Effects of cortisol, deoxycorticosterone and aldosterone on osmoregulation, gill Na<sup>+</sup>,K<sup>+</sup>-ATPase activity and isoform mRNA levels in Atlantic salmon. *Gen. Comp. Endocrinol.* **157**, 35-40.
- Meisner, J. D.** (1990). Effect of climatic warming on the southern margins of the native range of brook trout, *Salvelinus fontinalis*. *Can. J. Fish. Aquat. Sci.* **47**, 1065-1070.
- Metzger, D. C. H., Healy, T. M. and Schulte, P. M.** (2016). Conserved effects of salinity acclimation on thermal tolerance and hsp70 expression in divergent populations of threespine stickleback (*Gasterosteus aculeatus*). *J. Comp. Physiol. B* **186**, 879-889.
- Mommsen, T. P., Vijayan, M. M. and Moon, T. W.** (1999). Cortisol in teleosts: dynamics, mechanisms of action, and metabolic regulation. *Rev. Fish Biol. Fish.* **9**, 211-268.
- Murchie, K. J., Cooke, S. J., Danylchuk, A. J., Danylchuk, S. E., Goldberg, T. L., Suski, C. D. and Philipp, D. P.** (2011). Thermal biology of bonefish (*Albula vulpes*) in Bahamian coastal waters and tidal creeks: an integrated laboratory and field study. *J. Therm. Biol.* **36**, 38-48.
- Niu, C. J., Rummer, J. L., Brauner, C. J. and Schulte, P. M.** (2008). Heat shock protein (Hsp70) induced by a mild heat shock slightly moderates plasma osmolarity increases upon salinity transfer in rainbow trout (*Oncorhynchus mykiss*). *Comp. Biochem. Physiol. C Toxicol. Pharmacol.* **148**, 437-444.
- Norin, T., Malte, H. and Clark, T. D.** (2014). Aerobic scope does not predict the performance of a tropical eurythermal fish at elevated temperatures. *J. Exp. Biol.* **217**, 244-251.
- Pörtner, H.** (2001). Climate change and temperature-dependent biogeography: oxygen limitation of thermal tolerance in animals. *Naturwissenschaften* **88**, 137-146.
- Pörtner, H. O.** (2014). How and how not to investigate the oxygen and capacity limitation of thermal tolerance (OCLTT) and aerobic scope – remarks on the article by Gräns et al. *J. Exp. Biol.* **217**, 4432-4435.
- Pörtner, H.-O. and Giomi, F.** (2013). Nothing in experimental biology makes sense except in the light of ecology and evolution – correspondence on *J. Exp. Biol.* **216**, 4494-4495.
- Pörtner, H.-O. and Knust, R.** (2007). Climate change affects marine fishes through the oxygen limitation of thermal tolerance. *Science* **315**, 95-97.
- Re, A. D., Díaz, F. and Valdez, G.** (2006). Effect of salinity and temperature on thermal tolerance of brown shrimp *Farfantepenaeus aztecus* (Ives) (Crustacea, Penaeidae). *J. Therm. Biol.* **30**, 618-622.
- Re, A. D., Díaz, F., Ponce-Rivas, E., Giffard, I., Muñoz-Marquez, M. E. and Sigala-Andrade, H. M.** (2012). Combined effect of temperature and salinity on the thermotolerance and osmotic pressure of juvenile white shrimp *Litopenaeus vannamei* (Boone). *J. Therm. Biol.* **37**, 413-418.
- Sardella, B. A., Sanmarti, E. and Ltz, D. K.** (2008a). The acute temperature tolerance of green sturgeon (*Acipenser medirostris*) and the effect of environmental salinity. *J. Exp. Zool. A Ecol. Genet. Physiol.* **309A**, 477-483.
- Sardella, B. A., Kültz, D., Cech, J. J. and Brauner, C. J.** (2008b). Salinity-dependent changes in Na<sup>+</sup>/K<sup>+</sup>-ATPase content of mitochondria-rich cells contribute to differences in thermal tolerance of Mozambique tilapia. *J. Comp. Physiol. B* **178**, 249-256.
- Schulte, P. M.** (2015). The effects of temperature on aerobic metabolism: towards a mechanistic understanding of the responses of ectotherms to a changing environment. *J. Exp. Biol.* **218**, 1856-1866.
- Silva, P., Solomon, R., Spokes, K. and Epstein, F. H.** (1977). Ouabain inhibition of gill Na-K-ATPase: relationship to active chloride transport. *J. Exp. Zool.* **199**, 419-426.
- Singer, T. D., Finstad, B., McCormick, S. D., Wiseman, S. B., Schulte, P. M. and McKinley, R. S.** (2003). Interactive effects of cortisol treatment and ambient seawater challenge on gill Na<sup>+</sup>,K<sup>+</sup>-ATPase and CFTR expression in two strains of Atlantic salmon smolts. *Aquaculture* **222**, 15-28.
- Smith, T. R., Tremblay, G. C. and Bradley, T. M.** (1999). Hsp70 and a 54 kDa protein (Osp54) are induced in salmon (*Salmo salar*) in response to hyperosmotic stress. *J. Exp. Zool.* **284**, 286-298.
- Specker, J. L., Portesi, D. M., Cornell, S. C. and Veillette, P. A.** (1994). Methodology for implanting cortisol in Atlantic salmon and effects of chronically elevated cortisol on osmoregulatory physiology. *Aquaculture* **121**, 181-193.
- Stein, M. W.** (1963). D-glucose determination with hexokinase and glucose-6-phosphate dehydrogenase. In *Methods of Enzymatic Analysis* (ed. H. Bergmeyer), p. 177. New York: Academic Press.
- Stitt, B. C., Burness, G., Burgomaster, K. A., Currie, S., McDermid, J. L. and Wilson, C. C.** (2014). Intraspecific variation in thermal tolerance and acclimation capacity in brook trout (*Salvelinus fontinalis*): physiological implications for climate change. *Physiol. Biochem. Zool.* **87**, 15-29.
- Tsuchida, S.** (1995). The relationship between upper temperature tolerance and final preferendum of Japanese marine fish. *J. Therm. Biol.* **20**, 35-41.
- US Environmental Protection Agency** (1994). The Long Island Sound Study: Summary of the Comprehensive Conservation and Management Plan. EPA 842-S-94-001. Washington, DC: US Environmental Protection Agency.
- Veillette, P. A., Sundell, K. and Specker, J. L.** (1995). Cortisol mediates the increase in intestinal fluid absorption in Atlantic salmon during parr-smolt transformation. *Gen. Comp. Endocrinol.* **97**, 250-258.
- Verhille, C., Anttila, K. and Farrell, A. P.** (2013). A heart to heart on temperature: impaired temperature tolerance of triploid rainbow trout (*Oncorhynchus mykiss*) due to early onset of cardiac arrhythmia. *Comp. Biochem. Physiol. A* **164**, 653-657.
- Wedemeyer, G.** (1970). Stress of anesthesia with M.S. 222 and benzocaine in rainbow trout (*Salmo gairdneri*). *J. Fish. Res. Board Can.* **27**, 909-914.
- Wells, R. M. G. and Weber, R.** (1991). Is there an optimal haematocrit for rainbow trout, *Oncorhynchus mykiss* (Walbaum)? An interpretation of recent data based on blood viscosity measurements. *J. Fish Biol.* **38**, 53-65.
- Zaragoza, O. D. R., Rodriguez, M. H. and Ramirez, L. F. B.** (2008). Thermal stress effect on tilapia *Oreochromis mossambicus* (Pisces: Cichlidae) blood parameters. *Mar. Freshw. Behav. Physiol.* **2**, 135-145.
- Zhang, Y. and Kieffer, J. D.** (2014). Critical thermal maximum (CT<sub>max</sub>) and hematology of shortnose sturgeons (*Acipenser brevirostrum*) acclimated to three temperatures. *Can. J. Zool.* **92**, 215-221.
